# Supplementary material
Source: HighWire-hosted journal article supplement (https://bmjopen.bmj.com/content/8/5/e021878)
Supplement: inline-supplementary-material-2 [file inline-supplementary-material-2.pdf]

## Appendix 1.

|                                                                                          | SCHEDULE OF ASSESSMENTS AND PROCEDURES |                                    |                                      |                     |                             |                                   |                                             |                               |                                     |
|------------------------------------------------------------------------------------------|----------------------------------------|------------------------------------|--------------------------------------|---------------------|-----------------------------|-----------------------------------|---------------------------------------------|-------------------------------|-------------------------------------|
| Time<br>Time window                                                                      | Screening                              | Baseline 1<br>-3 weeks<br>± 1 week | Baseline 2<br>-1 day<br>Day -1 to -4 | "Surgery"<br>0<br>0 | Safety<br>Week 2<br>±5 days | Follow-up PK<br>Week 6<br>±1 week | Follow-up biomarkers<br>Month 4<br>±2 weeks | Safety<br>Year 1<br>±2 months | Follow-up PK<br>Year 2<br>±1 months |
| Check inclusion/exclusion criteria                                                       | B, D, C                                | B, D                               | B, D, C                              | B, D, C             | B, D                        | B, D                              | B, D                                        | B, D                          | B, D                                |
| Patient informed consent, ECG                                                            | B, D, C                                |                                    |                                      |                     |                             |                                   |                                             |                               |                                     |
| Demographics, medical and surgical history                                               |                                        | B, D                               | C                                    |                     |                             |                                   |                                             |                               |                                     |
| Menopausal status                                                                        | B, D, C                                |                                    |                                      |                     |                             |                                   |                                             |                               |                                     |
| Concomittant drugs and doses                                                             | B, D, C                                | B, D                               | B, D, C                              | B, C                |                             | B, D                              |                                             |                               | B, D                                |
| Height                                                                                   | B, D, C                                |                                    |                                      |                     |                             |                                   |                                             |                               |                                     |
| Vital signs, body composition <sup>a</sup> , heart monitoring <sup>b</sup> , alcohol use | B, D, C                                | B, D                               | B, D, C                              |                     | B, D                        | B, D                              | B, D                                        | B, D                          | B, D                                |
| AE reporting                                                                             |                                        | B, D                               | B, D, C                              | B, C                | B, D                        | B, D                              | B, D                                        | B, D                          | B, D                                |
| PROMS Questionnaires <sup>c</sup>                                                        |                                        | B, D                               |                                      |                     |                             | B, D                              |                                             | B, D                          | B, D                                |
| ApneaLink™                                                                               |                                        | B, D                               |                                      |                     |                             | B, D                              |                                             |                               | B, D                                |
| Controlled diet (LED/VLED)                                                               |                                        | B, D                               | B, D                                 | B, D                | B, D                        | B, D                              | D                                           | D                             | D                                   |
| Prophylactic antibiotics <sup>d</sup>                                                    |                                        |                                    |                                      | B                   |                             |                                   |                                             |                               |                                     |
| Cocktail investigation (blood and urine)                                                 |                                        | B, D                               | B, D, C                              |                     |                             | B, D                              |                                             |                               | B, D                                |
| Blood for 4β-OH-cholesterol                                                              |                                        | B, D                               | B, D, C                              |                     | B, D                        | B, D                              | B, D                                        | B, D                          | B, D                                |
| Blood and urine for biobanking                                                           |                                        | B, D                               | B, D, C                              |                     | B, D                        | B, D                              | B, D                                        | B, D                          | B, D                                |
| Blood for cytokines and FFA                                                              |                                        | B, D                               | B, D, C                              |                     | B, D                        | B, D                              | B, D                                        | B, D                          | B, D                                |
| Blood for internal body time                                                             |                                        | B, D                               | B, D, C                              |                     |                             | B, D                              |                                             |                               | B, D                                |
| Blood for DNA/genotyping                                                                 |                                        | B, D                               | C                                    |                     |                             | B, D                              |                                             |                               | B, D                                |
| Standard clinical chemistry <sup>e</sup>                                                 | B, D, C                                | B, D                               | B, D, C                              |                     | B, D                        | B, D                              | B, D                                        | B, D                          | B, D                                |
| Biopsies                                                                                 |                                        |                                    |                                      |                     |                             |                                   |                                             |                               |                                     |
| -- gastric ventricle                                                                     |                                        |                                    |                                      | B                   |                             | B                                 |                                             |                               | B                                   |
| -- ileum                                                                                 |                                        |                                    |                                      | B                   |                             |                                   |                                             |                               |                                     |
| -- jejunum (for <i>ex vivo</i> investigation)                                            |                                        |                                    |                                      | B                   |                             |                                   |                                             |                               |                                     |
| -- jejunum                                                                               |                                        |                                    |                                      | B                   |                             | B                                 |                                             |                               | B                                   |
| -- liver                                                                                 |                                        |                                    |                                      | B, C                |                             |                                   |                                             |                               |                                     |
| -- skeletal muscle                                                                       |                                        |                                    |                                      | B, C                |                             |                                   |                                             |                               |                                     |
| -- visceral fat                                                                          |                                        |                                    |                                      | B, C                |                             |                                   |                                             |                               |                                     |
| -- subcutaneous adipose tissue <sup>c</sup>                                              |                                        | B, D                               | B, D, C                              | B, C                | B, D                        | B, D                              | B, D                                        | B, D                          | B, D                                |
| Faeces                                                                                   |                                        | B, D                               | B, D, C                              |                     | B, D                        | B, D                              | B, D                                        | B, D                          | B, D                                |

### Patient groups:

Bariatric surgery patients

Diet-controls

Cholecystectomy patients

<sup>a</sup>Weight, bioimpedance, waist-hip ratio

<sup>b</sup>Blood pressure, heart rate, ECG

<sup>c</sup>SF-36, IWQOL, OWLQOL, WRSM, HADS and TFEQ

<sup>d</sup>sc-adipose tissue both before antibiotics and simultaneously with other biopsying

<sup>e</sup>including: Na, K, Ca, creat, ALP, ASAT, ALAT, tot-Chol, LDL, HDL, TG, fasting glucose, fasting insulin, HbA1c, hct, Hgb
